# Supplementary material
Source: PubMed Central journal article supplement (PMC5076377)
Supplement: NIHMS814276-supplement.pdf [file NIHMS814276-supplement.pdf]

**Supplemental Table 1. Diclofenac amounts in plasma of treated mice.**

| <b>Diclofenac dose (mg/kg)</b> | <b>Route of administration</b> | <b>Duration of treatment</b> | <b>Plasma concentration at the termination of experiment (ng/mL) (n=4)</b> |
|--------------------------------|--------------------------------|------------------------------|----------------------------------------------------------------------------|
| 10                             | Orally in drinking water       | 28 days                      | 12 ± 3                                                                     |
| 100                            | Orally in drinking water       | 18 hours                     | 330.8 ± 110.3                                                              |
